# Supplementary material for: De novo Assembly of the Brugia malayi Genome Using Long Reads from a Single MinION Flowcell
Source: PubMed Central journal article supplement (PMC6925183; doi:10.1038/s41598-019-55908-y), 2019-12-20
Supplement: 41598_2019_55908_MOESM1_ESM.pdf [file 41598_2019_55908_MOESM1_ESM.pdf]

## Supplementary information

**Title:** *De novo* Assembly of the *Brugia malayi* Genome Using Long Reads from a Single MinION Flowcell

Joseph R. Fauver<sup>1,#,\*</sup>, John Martin<sup>2</sup>, Gary J. Weil<sup>1</sup>, Makedonka Mitreva<sup>1,2</sup> Peter U. Fischer<sup>1</sup>

1- Division of Infectious Diseases, Department of Medicine, Washington University School of Medicine,  
St. Louis, MO, United States

2- McDonnell Genome Institute, Washington University School of Medicine, St. Louis, MO, United States

# Current address: Department of Epidemiology of Microbial Diseases, Yale School of Public Health, New  
Haven, CT, United States

\*Correspondence to Joseph R. Fauver [fauverjoseph@gmail.com](mailto:fauverjoseph@gmail.com)

**Supplementary Figure 1- Depth of coverage across each major contig in the reference genome, mitochondrial genome, and wBM genome.**

**Supplementary Figure 2- Percent nucleotide identity of reads covering greater than 90% of the mitochondrial genome**

**Supplementary File 1- Gene features identified in areas of no coverage in the reference genome.**

**Supplementary Figure 1**

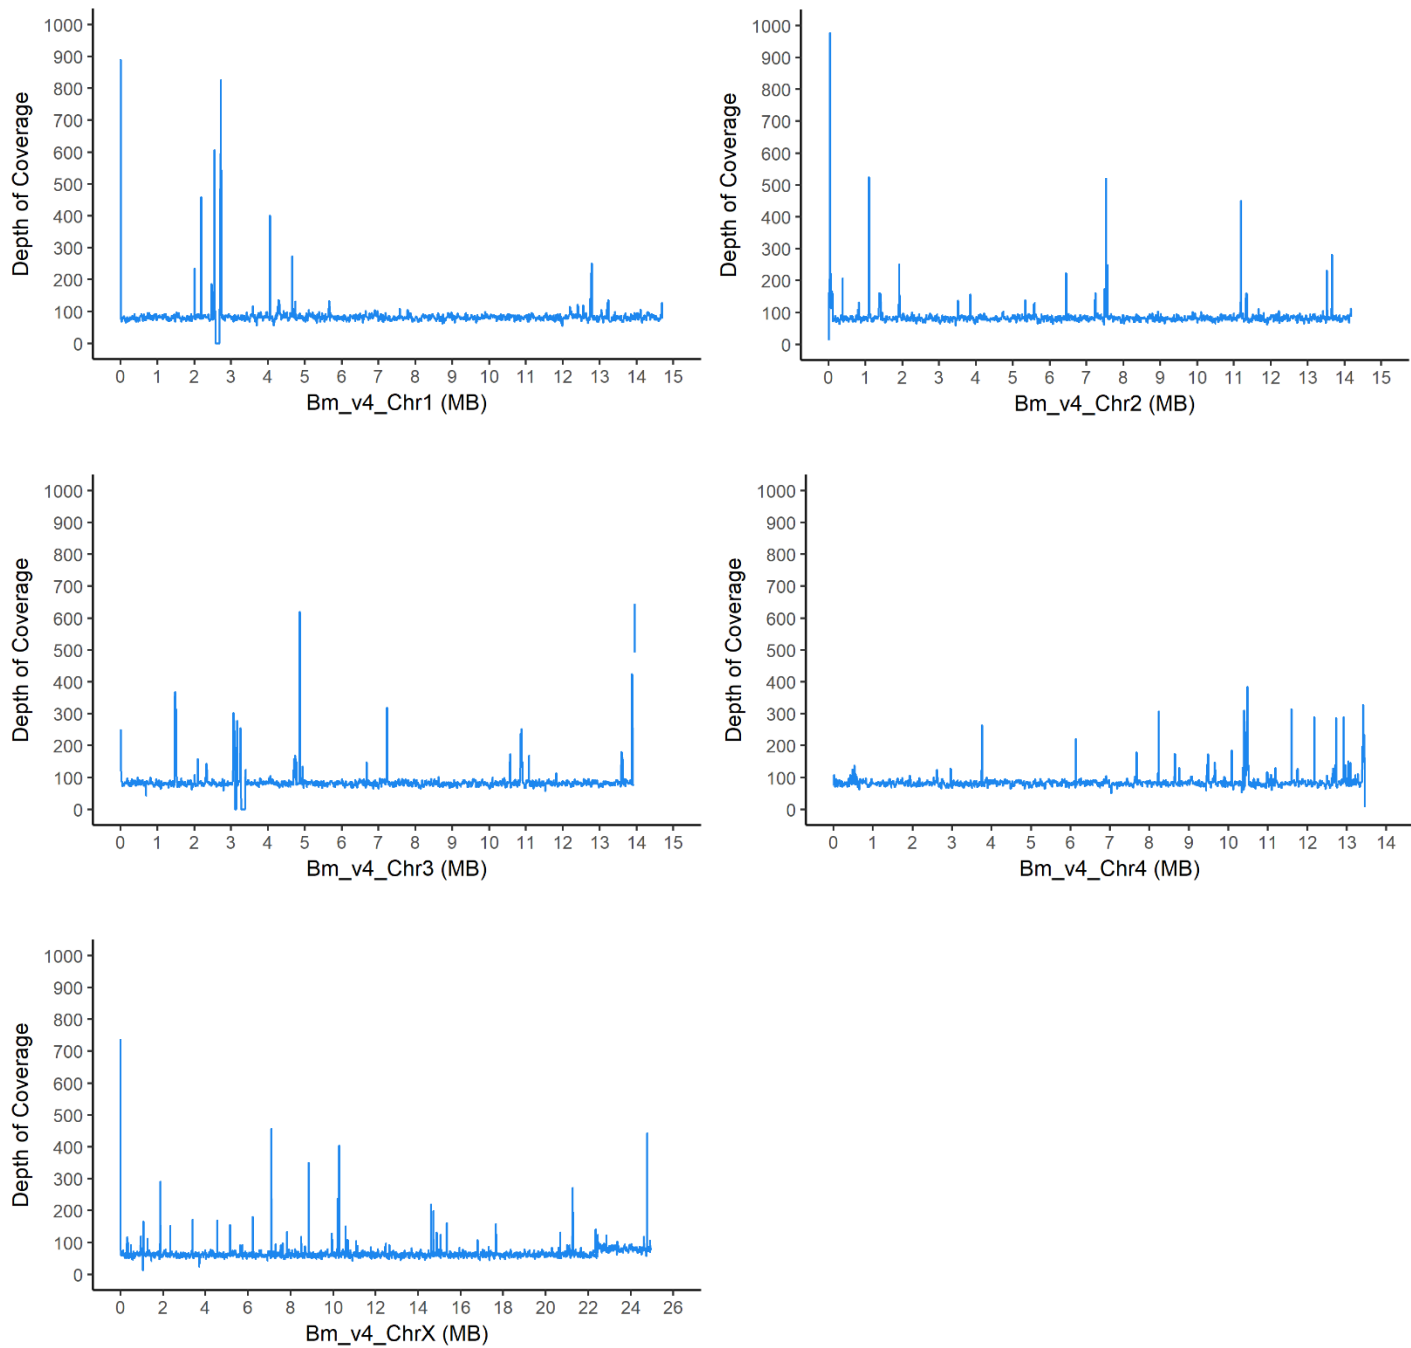

Supplementary Figure 1 continued

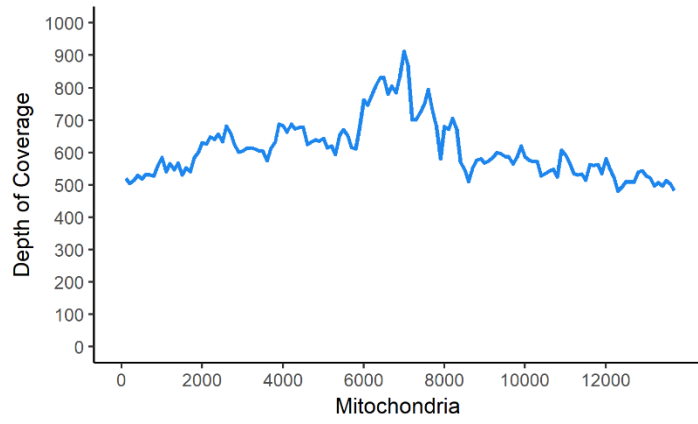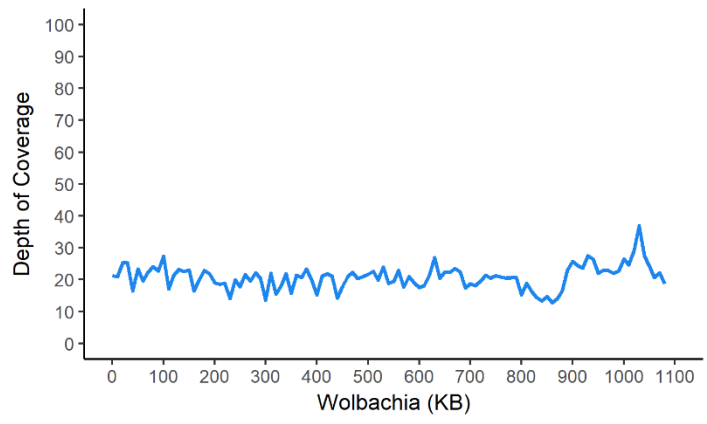

Supplementary Figure 2

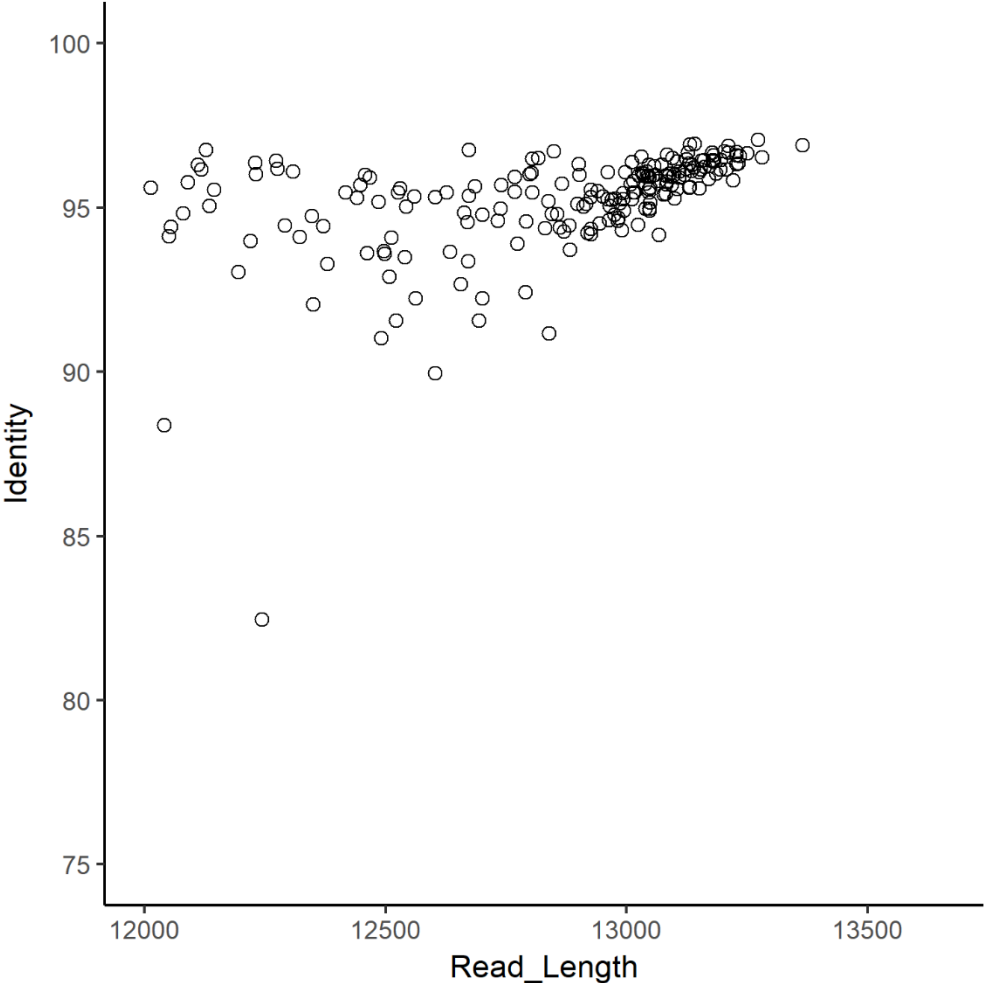

**Supplementary Table 1: Assembly mismatches compared to the reference genome**

| Genome Segment    | Length<br>(b.p.) | ONT Assembly Pre-Polishing |                        |                       | ONT Assembly Post-Polishing |                        |                       |
|-------------------|------------------|----------------------------|------------------------|-----------------------|-----------------------------|------------------------|-----------------------|
|                   |                  | Total<br>Mismatches        | Mismatches<br>per b.p. | Mismatches<br>per 1kb | Total<br>Mismatches         | Mismatches<br>per b.p. | Mismatches<br>per 1kb |
| Bm_v4_Chr1        | 14701151         | 198499                     | 0.01                   | 13.50                 | 112895                      | 0.008                  | 7.68                  |
| Bm_v4_Chrom2      | 14214749         | 195689                     | 0.01                   | 13.77                 | 111435                      | 0.008                  | 7.84                  |
| Bm_v4_Chr3        | 13951302         | 188196                     | 0.01                   | 13.49                 | 103327                      | 0.007                  | 7.41                  |
| Bm_v4_Chr4        | 13467244         | 194188                     | 0.01                   | 14.42                 | 110512                      | 0.008                  | 8.21                  |
| Bm_v4_ChrX        | 24943668         | 279625                     | 0.01                   | 11.21                 | 146124                      | 0.006                  | 5.86                  |
| Remaining contigs | 5877599          | 65291                      | 0.01                   | 11.11                 | 46229                       | 0.008                  | 7.87                  |
| 5 Major Contigs   | 81278114         | 1056197                    | 0.01                   | 12.99                 | 584293                      | 0.007                  | 7.19                  |
| Nuclear Genome    | 87155713         | 1121588                    | 0.01                   | 12.87                 | 630522                      | 0.007                  | 7.23                  |

---

**Supplementary Table 2: BUSCO/CDS Statistics for Reference and MinION Assemblies**

---

| <b>BUSCOs (N=303)</b>                   | <b>Reference Assembly</b> | <b>Canu_Filtlong Assembly</b> | <b>Canu_Filtlong_Polished</b> |
|-----------------------------------------|---------------------------|-------------------------------|-------------------------------|
| Complete and single-copy BUSCOs         | 289                       | 262                           | 277                           |
| Complete and duplicated BUSCOs          | 4                         | 0                             | 2                             |
| Fragmented BUSCOs                       | 1                         | 24                            | 11                            |
| Missing BUSCOs                          | 9                         | 17                            | 13                            |
| Total BUSCOs identified                 | 294                       | 286                           | 290                           |
| Proportion of BUSCOs identified         | 97.00%                    | 94.40%                        | 95.71%                        |
| Avg CDS Length (b.p.) per shared BUSCO* | 133.7                     | 106.8                         | 120                           |
| Avg Number of CDS per shared BUSCO      | 9.6                       | 10.5                          | 10.5                          |

---

\*- The assemblies shared a total of 160 complete single-copy BUSCOs

---
